# Supplementary material
Source: publisher figshare collection journal article supplement (https://diabetesjournals.figshare.com/ndownloader/files/26533133)
Supplement: Supplementary file 1 [file 26533133]

SUPPLEMENTAL MATERIAL: Supplementary Figure S1: Hazard Ratio for the Association of A1c and Adjudicated CVD events in Fully adjusted Model, including Residential Segregation, in Participants without Diabetes

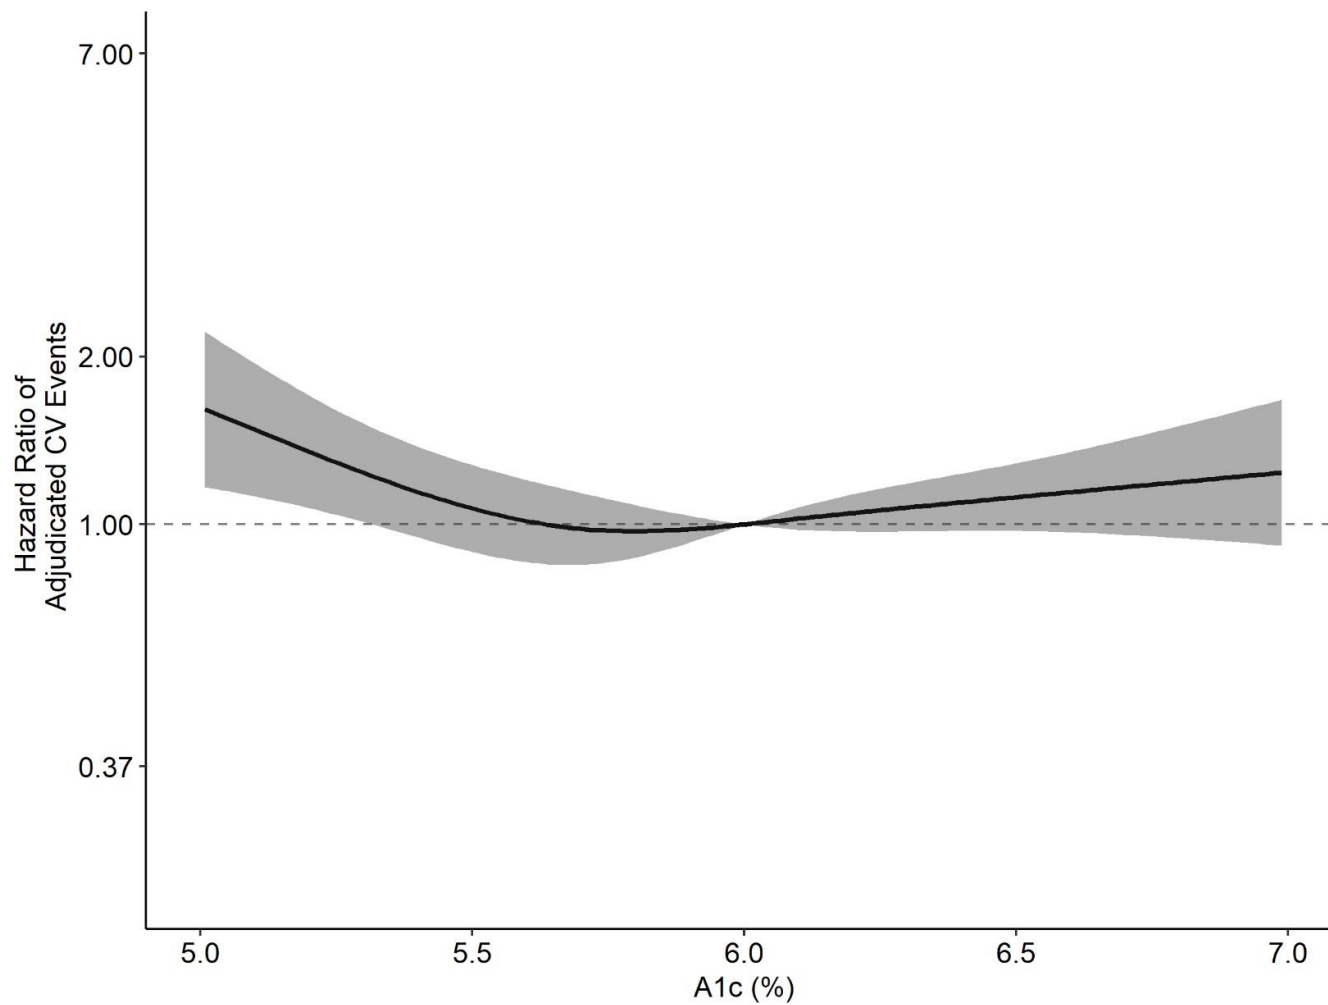

Supplemental Figure S2: Hazard ratios for the Association between A1c and CVD according to tertiles of Racial Residential Segregation Measures (dissimilarity, interaction, isolation) in Individuals with Diabetes, stratified by race

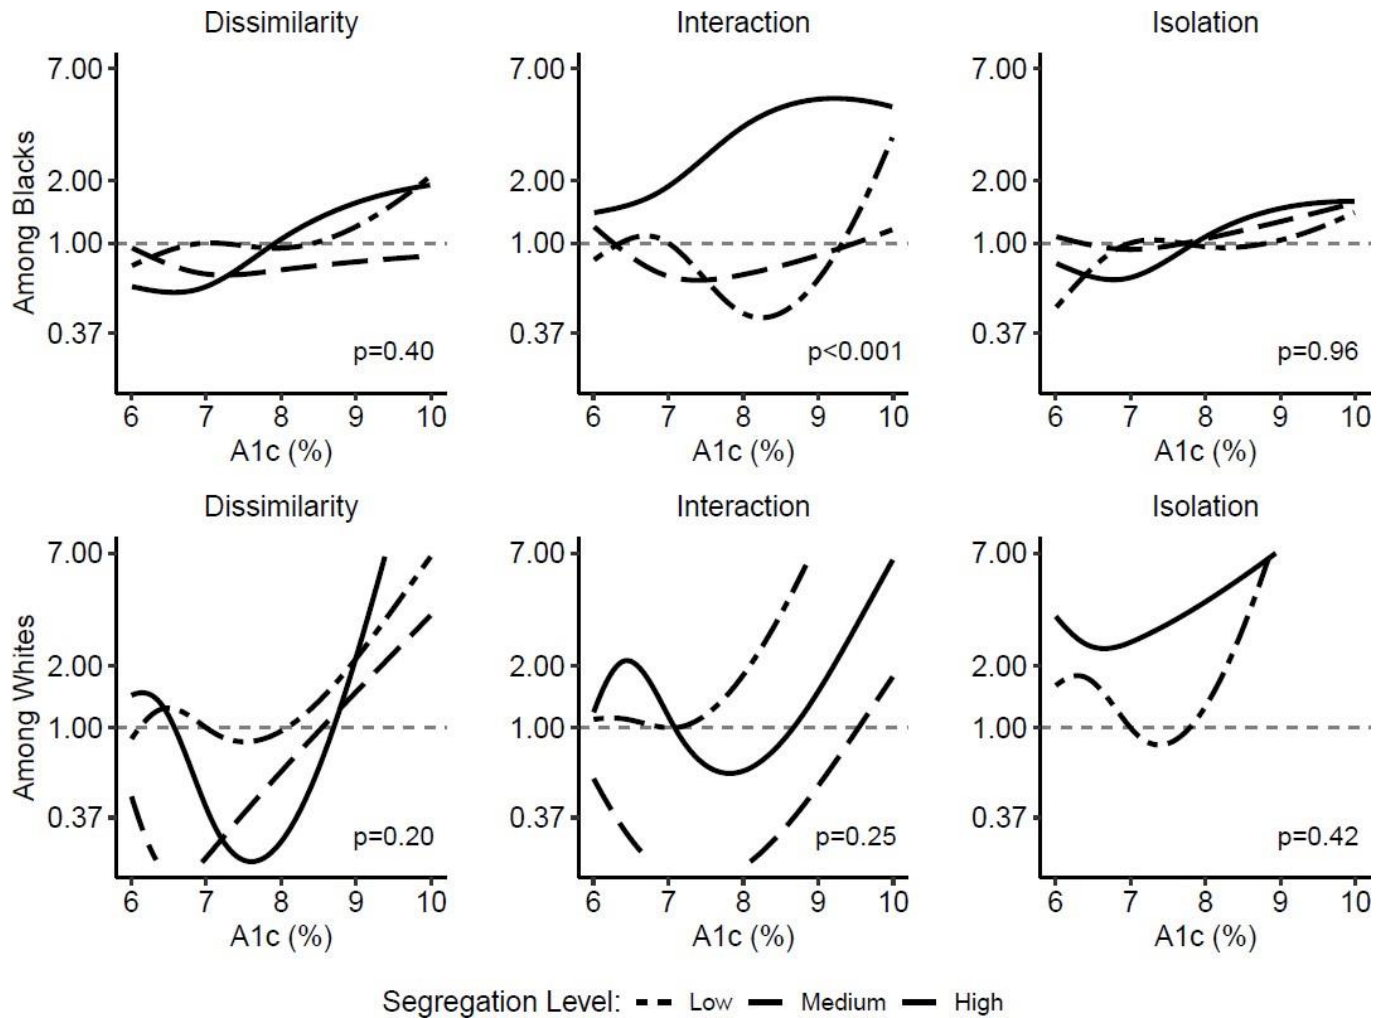

SUPPLEMENTARY TABLE S1: CV Risk Factor Profile in the Sub-cohort by Level of Residential Segregation as Measured by the Interaction Index

| CV RISK FACTOR                                               | LOW              | MEDIUM           | HIGH             |
|--------------------------------------------------------------|------------------|------------------|------------------|
|                                                              | SEGREGATION      | SEGREGATION      | SEGREGATION      |
|                                                              | [0.486 - 0.994]  | [0.314 - 0.486]  | [0.101 - 0.314]  |
| Sample Size (Unweighted)                                     | N = 687          | N = 702          | N = 747          |
| Systolic BP ( <i>mmHg</i> ), Mean (SD)                       | 125 (14.8)       | 126 (15.1)       | 130 (18.0)       |
| Body Mass Index ( <i>kg/m<sup>2</sup></i> ), Mean (SD)       | 28.7 (5.51)      | 29.6 (6.08)      | 30.0 (6.16)      |
| LDL Cholesterol ( <i>mg/dL</i> ), Mean (SD)                  | 118 (33.0)       | 114 (35.5)       | 117 (34.5)       |
| HDL Cholesterol ( <i>mg/dL</i> ), Mean (SD)                  | 50.8 (14.9)      | 53.1 (16.7)      | 54.2 (16.1)      |
| C-reactive Protein ( <i>mg/L</i> ), Median (Inner Quartiles) | 1.93 [0.94-4.27] | 2.47 [1.07-4.98] | 2.16 [0.98-5.14] |
